# Supplementary material for: Highly stable foams generated in mixed systems of ethanediyl-1,2-bis(dodecyldimethylammonium bromide) and alcohols
Source: Royal Society of Chemistry journal article supplement (doi:10.1039/c5ra16799j), 2015-01-01
Supplement: c5ra16799j1.pdf [file c5ra16799j1.pdf]

## Highly stable foams generated in mixed systems of ethanediyl-1, 2-bis(dodecyldimethylammonium bromide) and alcohols

Bing-Lei Song<sup>1</sup>, Xiao-Na Yu<sup>1</sup>, Jian-Xi Zhao<sup>2\*</sup>, Guo-Jing Sun<sup>2</sup>

1. The Key Laboratory of Food Colloids and Biotechnology, Ministry of Education, School of Chemical and Material Engineering, Jiangnan University, Wuxi, Jiangsu 214122, P. R. China

2. Institute of Colloid and Interface Chemistry, College of Chemistry and Chemical Engineering, Fuzhou University, Fuzhou, Fujian, 350108, P. R. China

### 1. Synthesis of ethanediyl-1, 2-bis(dodecyldimethylammonium bromide) (12-2-12)

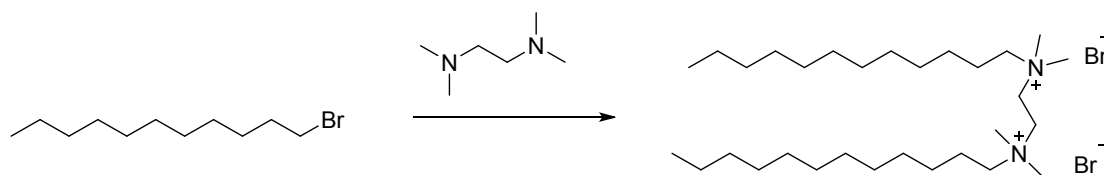

Scheme S1 The synthetic procedure of 12-2-12

1-Bromododecane (30g, 0.12mol), N,N,N',N'-tetramethylethylenediamine (5.8g, 0.05mol) and 100mL ethanol were added into a flask equipped with a reflux condenser. The reaction was carried out at 85°C for 24h. The solvent in the reaction mixture was removed under reduced pressure. The remaining solid was recrystallized with ethanol/ethyl acetate twice. After dried under vacuum at 45 °C, the final product was obtained as white powder. Yield: 41.3%.

<sup>1</sup>H NMR (400 MHz, CDCl<sub>3</sub>) δ 4.64 (s, 4H), 3.64 (t, *J* = 7.8 Hz, 4H), 3.44 (s, 12H), 1.75 (s, 4H), 1.31-1.19 (m, 36H), 0.81 (t, *J* = 6.8 Hz, 6H).

Elemental analysis

Anal. Calcd. for C<sub>30</sub>H<sub>66</sub>Br<sub>2</sub>N<sub>2</sub>: C, 58.62; H, 10.82; N, 4.56. Found: C, 58.39; H, 11.01; N, 4.45.

### 2. The interfacial dilational experiment data and fitting results with LVT model of different systems

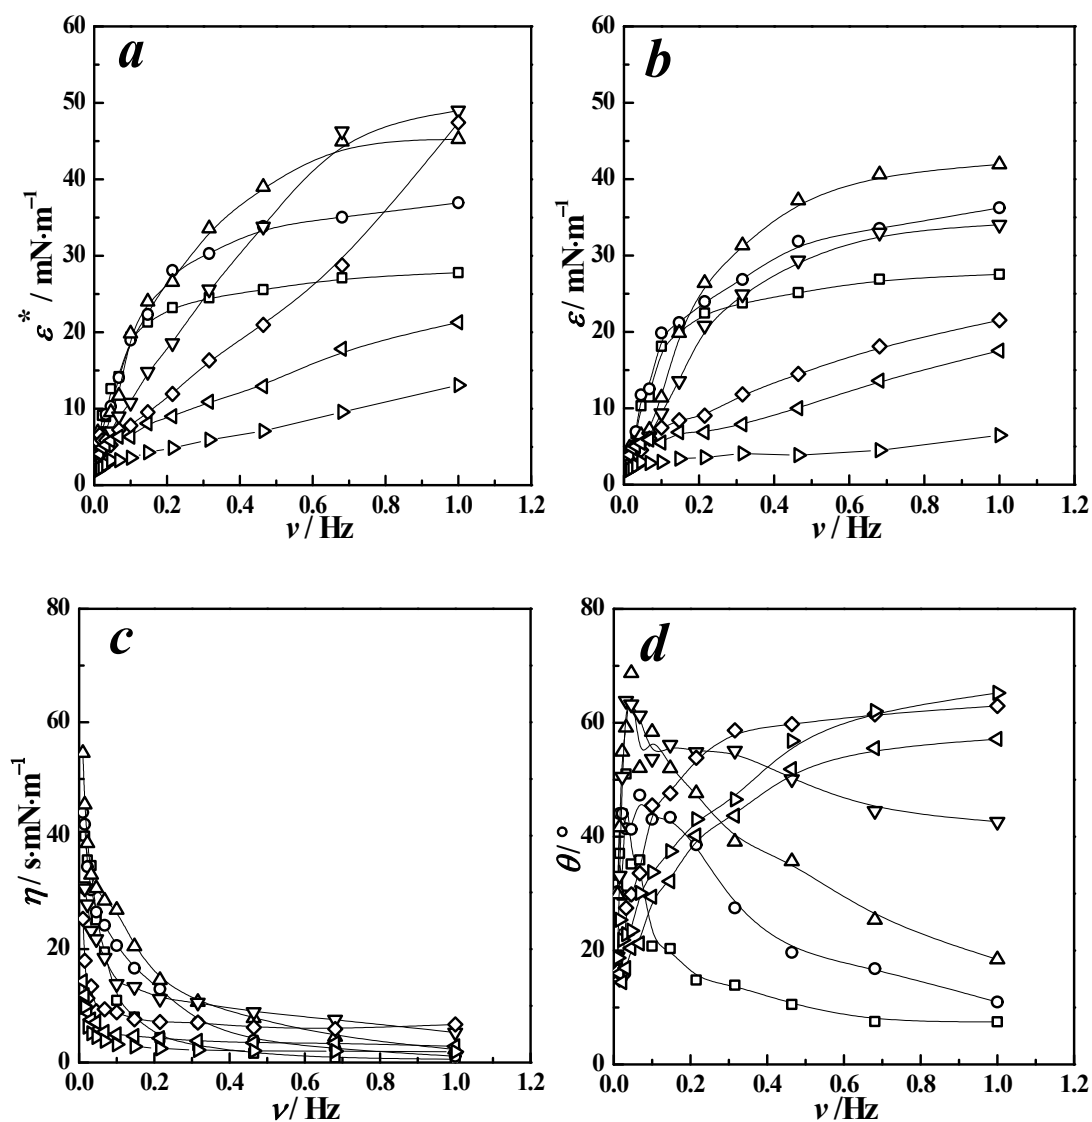

**Fig.S1** The experimental plots of complex modulus ( $\epsilon^*$ , *a*), interfacial elasticity ( $\epsilon$ , *b*), interfacial viscosity ( $\eta$ , *c*) and phase angle ( $\theta$ , *d*), as a function of frequency ( $\nu$ ), respectively, in 12-2-12/5.5mMC<sub>6</sub>OH aqueous solutions at 25°C. The symbols represent different surfactant concentrations:  $\log(C/\text{mmol}\cdot\text{L}^{-1}) = -1.38$  ( $\square$ ),  $-1.18$  ( $\circ$ ),  $-1.00$  ( $\triangle$ ),  $-0.78$  ( $\nabla$ ),  $-0.60$  ( $\diamond$ ),  $-0.40$  ( $\triangleleft$ ),  $0.20$  ( $\chi$ ).

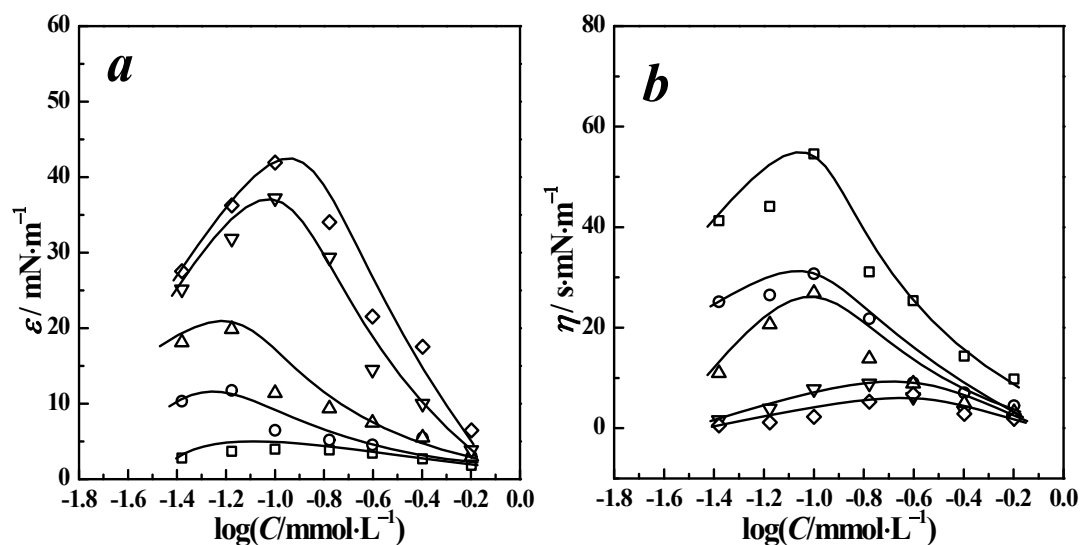

**Fig.S2** Semilogarithmic plots of dilational interfacial elasticity ( $\epsilon$ , *a*) and interfacial viscosity ( $\eta$ , *b*) of 12-2-12/5.5mMC<sub>6</sub>OH as a function of the surfactant concentration  $C$  for different frequencies.

The symbols represent  $\nu/\text{Hz} = 0.010$  ( $\square$ ),  $0.046$  ( $\circ$ ),  $0.100$  ( $\triangle$ ),  $0.464$  ( $\nabla$ ) and  $1.000$  ( $\diamond$ )

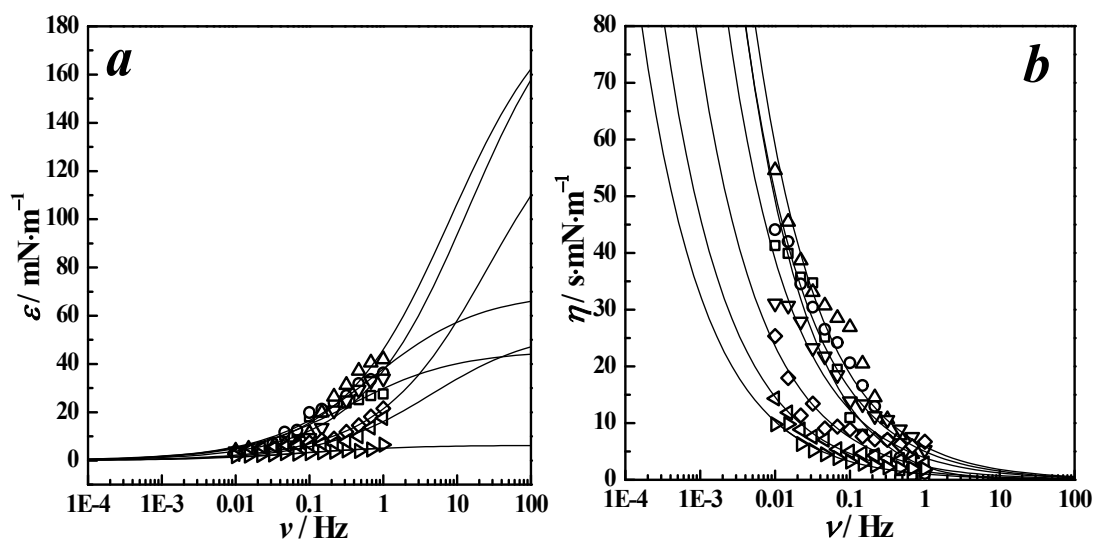

**Fig.S3** Fitting results of dilational interfacial elasticity ( $\epsilon$ , *a*) and interfacial viscosity ( $\eta$ , *b*) in terms of LVT model for 12-2-12/5.5mMC<sub>6</sub>OH aqueous solutions at 25°C. The symbols represent different surfactant concentrations:  $\log(C/\text{mmole}\cdot\text{L}^{-1}) = -1.38$  ( $\square$ ),  $-1.18$  ( $\circ$ ),  $-1.00$  ( $\triangle$ ),  $-0.78$  ( $\nabla$ ),  $-0.60$  ( $\diamond$ ),  $-0.40$  ( $\triangleleft$ ),  $0.20$  ( $\chi$ ).

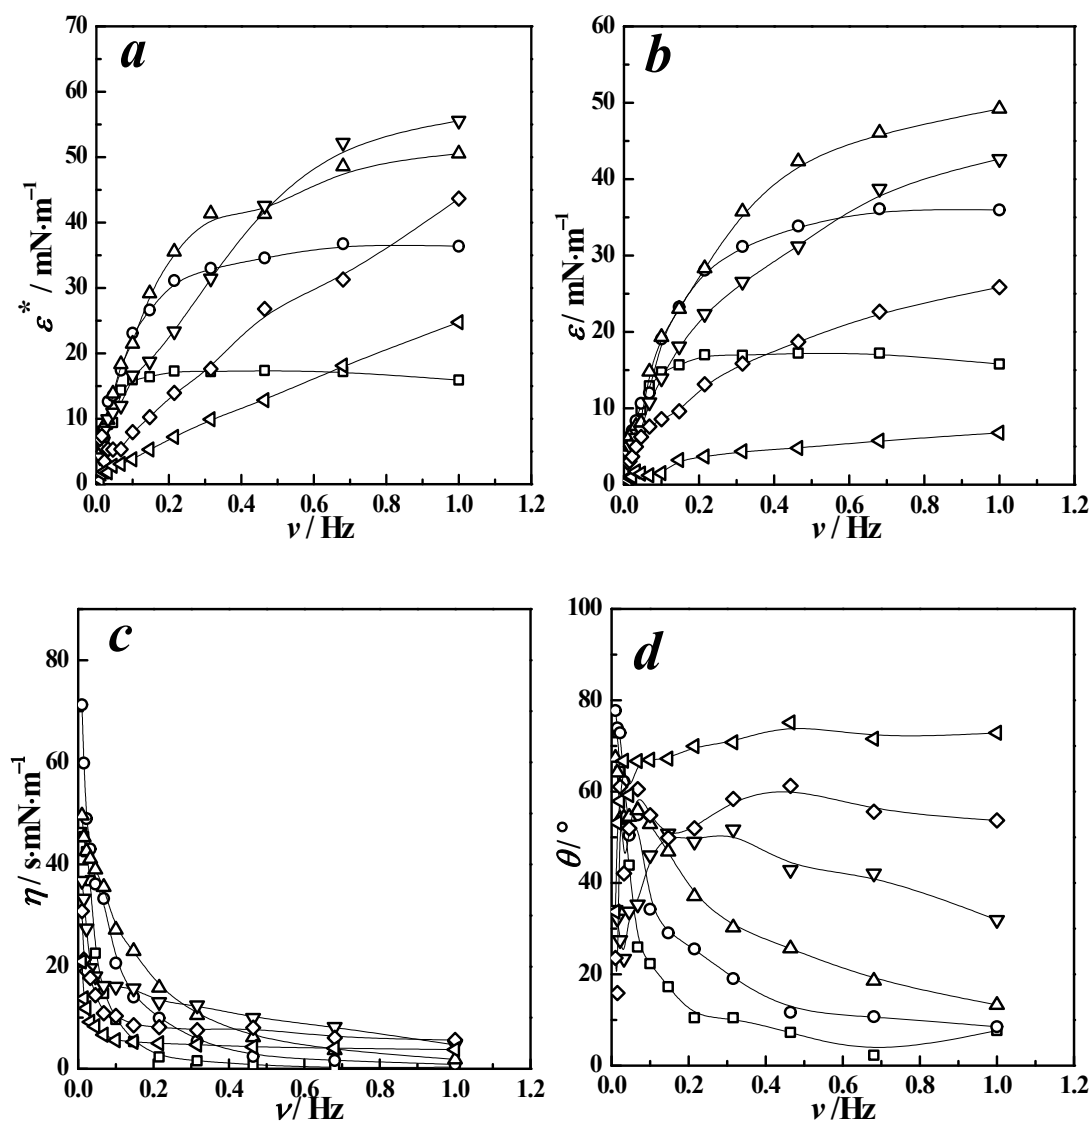

**Fig.S4** The experimental plots of complex modulus ( $\epsilon^*$ , *a*), interfacial elasticity ( $\epsilon$ , *b*), interfacial viscosity ( $\eta$ , *c*) and phase angle ( $\theta$ , *d*), as a function of frequency ( $\nu$ ), respectively, in 12-2-12/4mMC<sub>6</sub>OH aqueous solutions at 25°C. The symbols represent different surfactant concentrations:  $\log(C/\text{mmol}\cdot\text{L}^{-1}) = -1.38$  (□),  $-1.18$  (○),  $-1.00$  (△),  $-0.78$  (▽),  $-0.60$  (◇),  $-0.40$  (<)

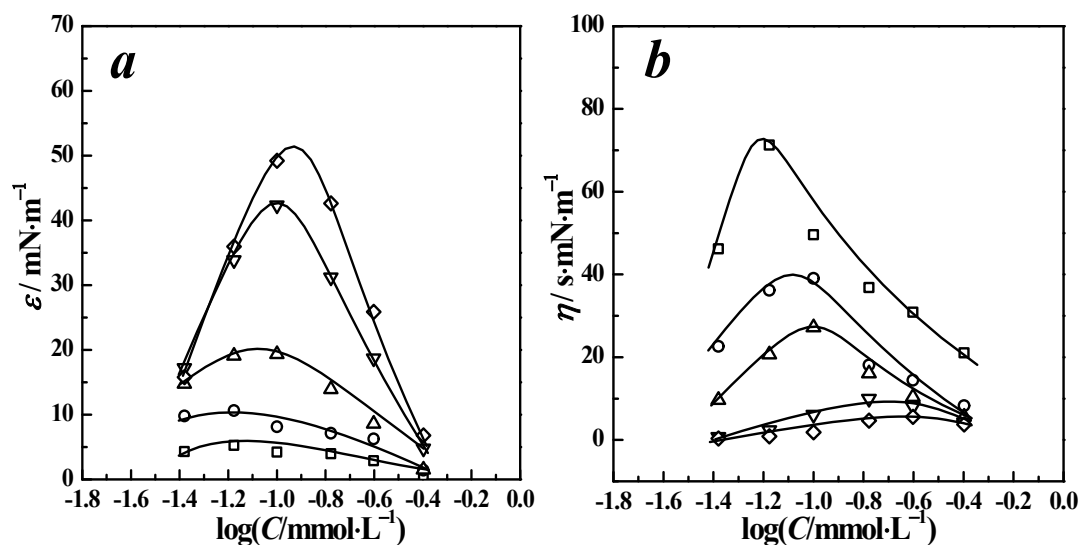

**Fig.S5** Semilogarithmic plots of dilational interfacial elasticity ( $\epsilon$ , *a*) and interfacial viscosity ( $\eta$ , *b*) of 12-2-12/4mMC<sub>6</sub>OH as a function of the surfactant concentration  $C$  for different frequencies. The symbols represent  $\nu/\text{Hz} = 0.010$  ( $\square$ ),  $0.046$  ( $\circ$ ),  $0.100$  ( $\triangle$ ),  $0.464$  ( $\nabla$ ) and  $1.000$  ( $\diamond$ )

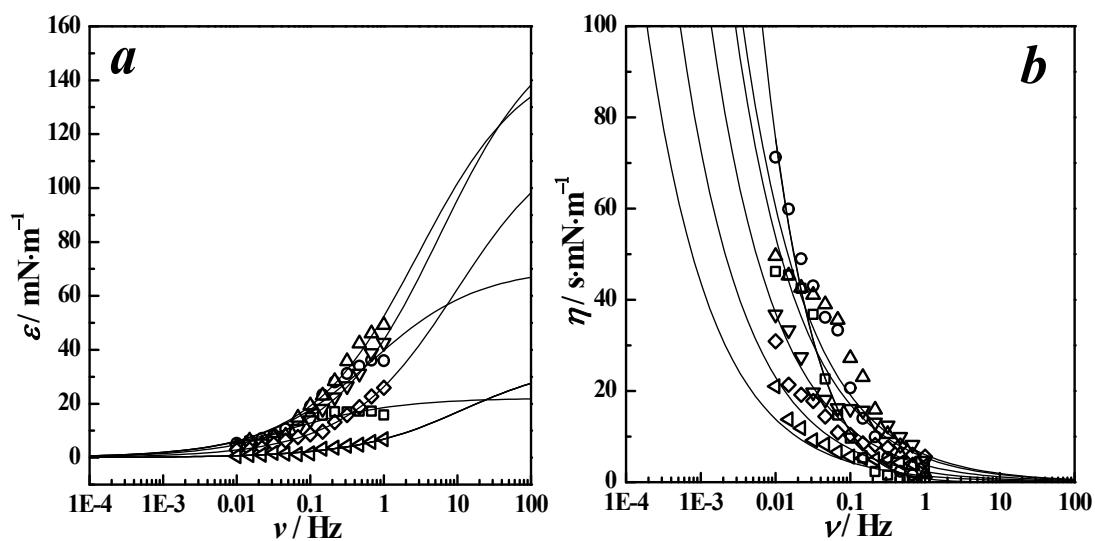

**Fig.S6** Fitting results of dilational interfacial elasticity ( $\epsilon$ , *a*) and interfacial viscosity ( $\eta$ , *b*) in terms of LVT model for 12-2-12/4mMC<sub>6</sub>OH aqueous solutions at 25°C. The symbols represent different surfactant concentrations:  $\log(C/\text{mmole}\cdot\text{L}^{-1}) = -1.38$  ( $\square$ ),  $-1.18$  ( $\circ$ ),  $-1.00$  ( $\triangle$ ),  $-0.78$  ( $\nabla$ ),  $-0.60$  ( $\diamond$ ),  $-0.40$  ( $\triangleleft$ )

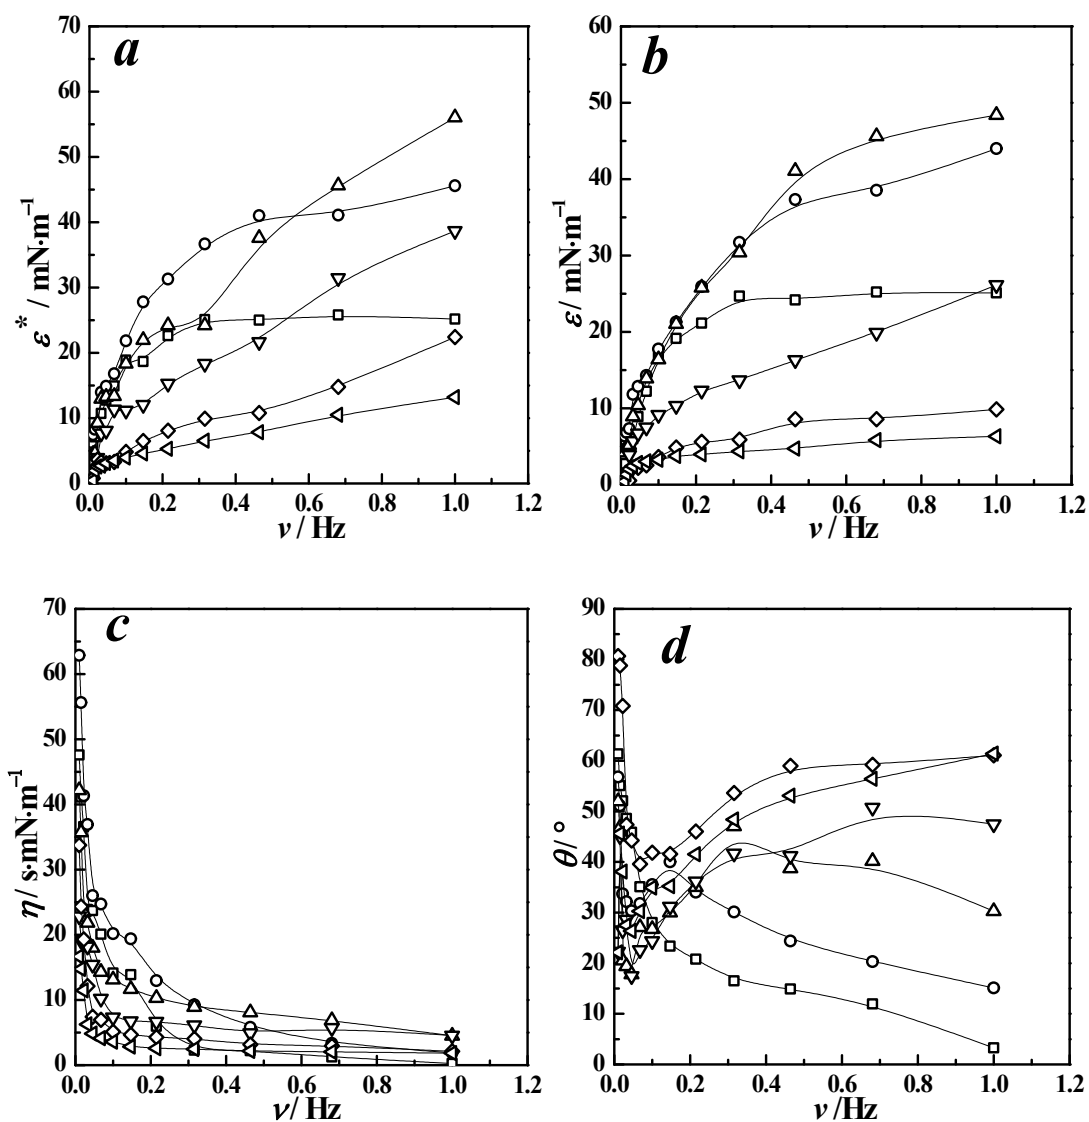

**Fig.S7** The experimental plots of complex modulus ( $\epsilon^*$ , *a*), interfacial elasticity ( $\epsilon$ , *b*), interfacial viscosity ( $\eta$ , *c*) and phase angle ( $\theta$ , *d*), as a function of frequency ( $\nu$ ), respectively, in 12-2-12/8mMC<sub>6</sub>OH aqueous solutions at 25°C. The symbols represent different surfactant concentrations:  $\log(C/\text{mmol}\cdot\text{L}^{-1}) = -1.38$  (□),  $-1.00$  (○),  $-0.78$  (△),  $-0.60$  (▽),  $-0.40$  (◇),  $-0.20$  (<)

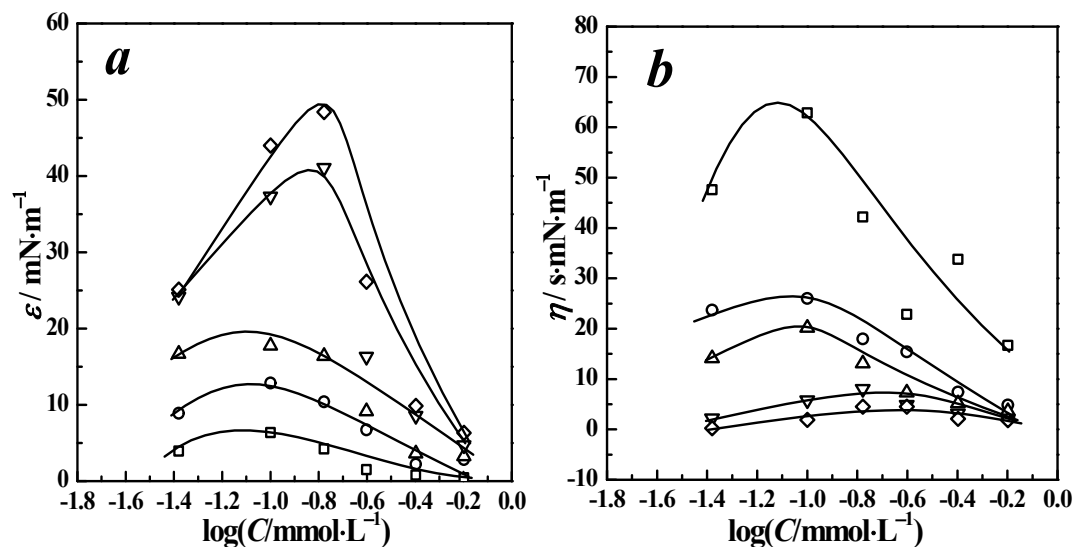

**Fig.S8** Semilogarithmic plots of dilational interfacial elasticity ( $\epsilon$ , *a*) and interfacial viscosity ( $\eta$ , *b*) of 12-2-12/8mMC<sub>6</sub>OH as a function of the surfactant concentration  $C$  for different frequencies. The symbols represent  $\nu/\text{Hz} = 0.010$  ( $\square$ ),  $0.046$  ( $\circ$ ),  $0.100$  ( $\triangle$ ),  $0.464$  ( $\nabla$ ) and  $1.000$  ( $\diamond$ )

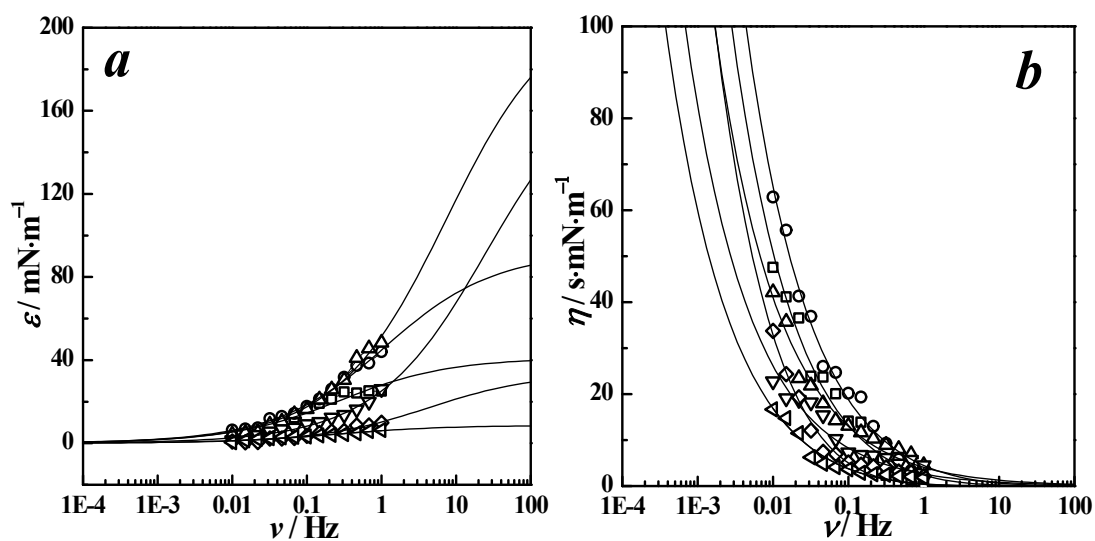

**Fig.S9** Fitting results of dilational interfacial elasticity ( $\epsilon$ , *a*) and interfacial viscosity ( $\eta$ , *b*) in terms of LVT model for 12-2-12/8mMC<sub>6</sub>OH aqueous solutions at 25°C. The symbols represent different surfactant concentrations:  $\log(C/\text{mmol}\cdot\text{L}^{-1}) = -1.38$  ( $\square$ ),  $-1.00$  ( $\circ$ ),  $-0.78$  ( $\triangle$ ),  $-0.60$  ( $\nabla$ ),  $-0.40$  ( $\diamond$ ),  $-0.20$  ( $<$ )

**Table S1** Foam decay time  $t_{1/2}^{\max}$  and limiting interfacial elasticity  $\varepsilon_{0,fit}$  of 12-2-12/4mMC<sub>6</sub>OH, 12-2-12/5.5mMC<sub>6</sub>OH and 12-2-12/8mMC<sub>6</sub>OH mixed systems at the surface excess of 80%

| system                                            | 12-2-12/4mMC <sub>6</sub> OH | 12-2-12/5.5mMC <sub>6</sub> OH | 12-2-12/8mMC <sub>6</sub> OH |
|---------------------------------------------------|------------------------------|--------------------------------|------------------------------|
| $10^{10}\Gamma_{\max}$ mol·cm <sup>-2</sup>       | 3.62                         | 3.98                           | 2.46                         |
| 80%* $10^{10}\Gamma_{\max}$ /mol·cm <sup>-2</sup> | 2.90                         | 3.18                           | 1.97                         |
| C/mmol·L <sup>-1</sup>                            | 0.057                        | 0.036                          | 0.076                        |
| $\varepsilon_{0,fit}$ /mN·m <sup>-1</sup>         | 54.17                        | 66.33                          | 56.67                        |
| $t_{1/2}^{\max}$ /min                             | 958                          | 1413                           | 1188                         |

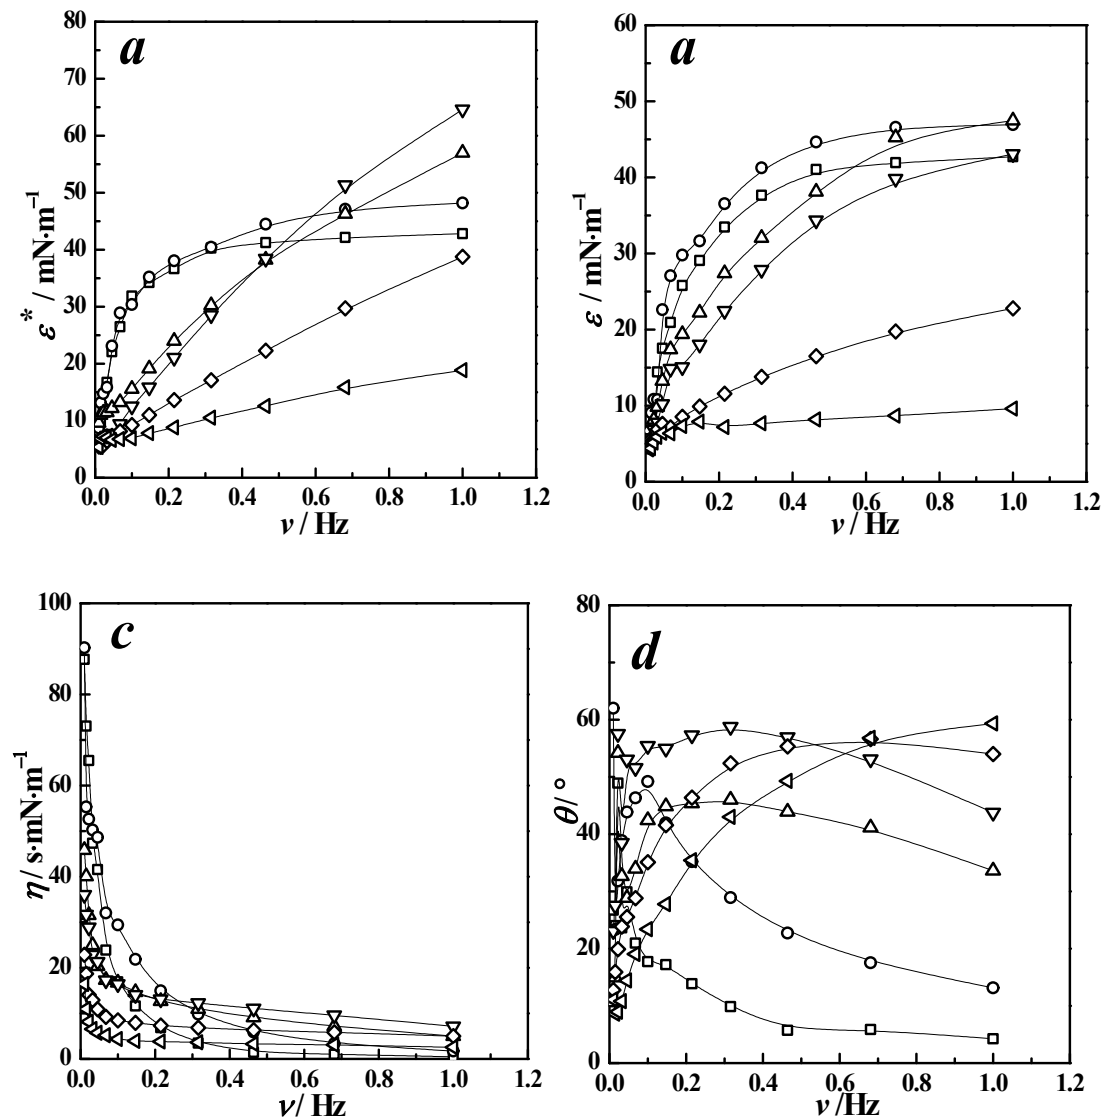

**Fig.S10** The experimental plots of complex modulus ( $\varepsilon^*$ , a), interfacial elasticity ( $\varepsilon$ , b), interfacial



viscosity ( $\eta$ ,  $c$ ) and phase angle ( $\theta$ ,  $d$ ), as a function of frequency ( $\nu$ ), respectively, in 12-2-12/0.3mMC<sub>7</sub>OH aqueous solutions at 25°C. The symbols represent different surfactant concentrations:  $\log(C/\text{mmol}\cdot\text{L}^{-1}) = -1.30$  ( $\square$ ),  $-1.18$  ( $\circ$ ),  $-0.93$  ( $\triangle$ ),  $-0.74$  ( $\nabla$ ),  $-0.52$  ( $\diamond$ ),  $-0.30$  ( $\blacktriangleleft$ )

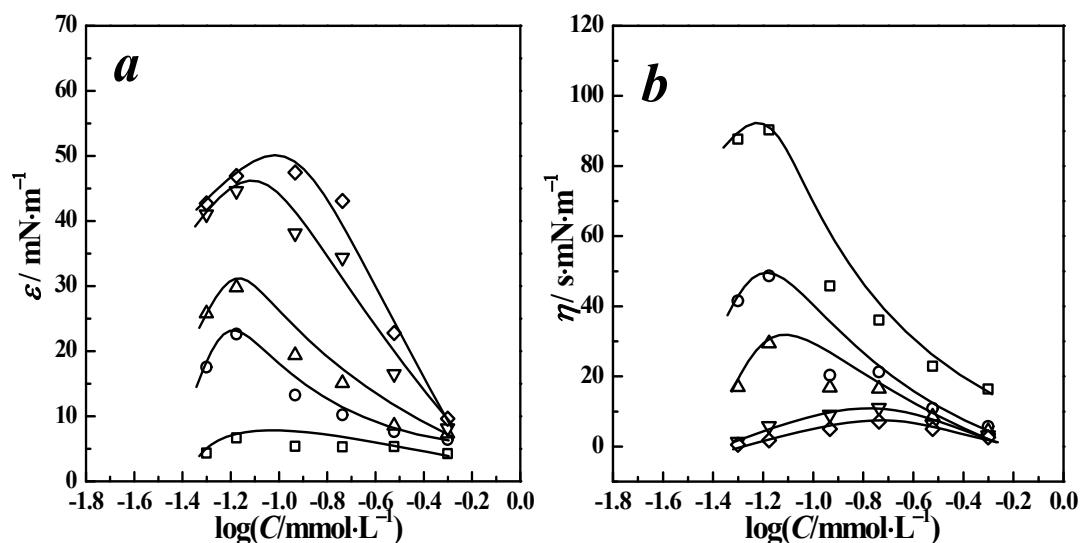

**Fig.S11** Semilogarithmic plots of dilational interfacial elasticity ( $\epsilon$ ,  $a$ ) and interfacial viscosity ( $\eta$ ,  $b$ ) of 12-2-12/0.3mMC<sub>7</sub>OH as a function of the surfactant concentration  $C$  for different frequencies. The symbols represent  $\nu/\text{Hz} = 0.010$  ( $\square$ ),  $0.046$  ( $\circ$ ),  $0.100$  ( $\triangle$ ),  $0.464$  ( $\nabla$ ) and  $1.000$  ( $\diamond$ )

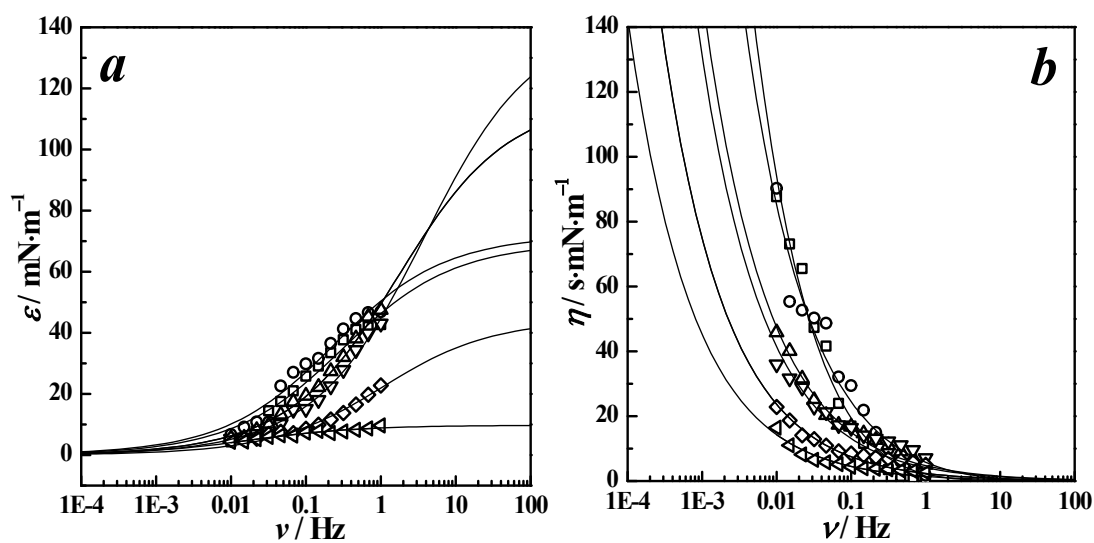

**Fig.S12** Fitting results of dilational interfacial elasticity ( $\epsilon$ ,  $a$ ) and interfacial viscosity ( $\eta$ ,  $b$ ) in

terms of LVT model for 12-2-12/0.3mMC<sub>7</sub>OH aqueous solutions at 25°C. The symbols represent different surfactant concentrations:  $\log(C/\text{mmol}\cdot\text{L}^{-1}) = -1.30$  ( $\square$ ),  $-1.18$  ( $\circ$ ),  $-0.93$  ( $\triangle$ ),  $-0.74$  ( $\nabla$ ),  $-0.52$  ( $\diamond$ ),  $-0.30$  ( $\blacktriangleleft$ )

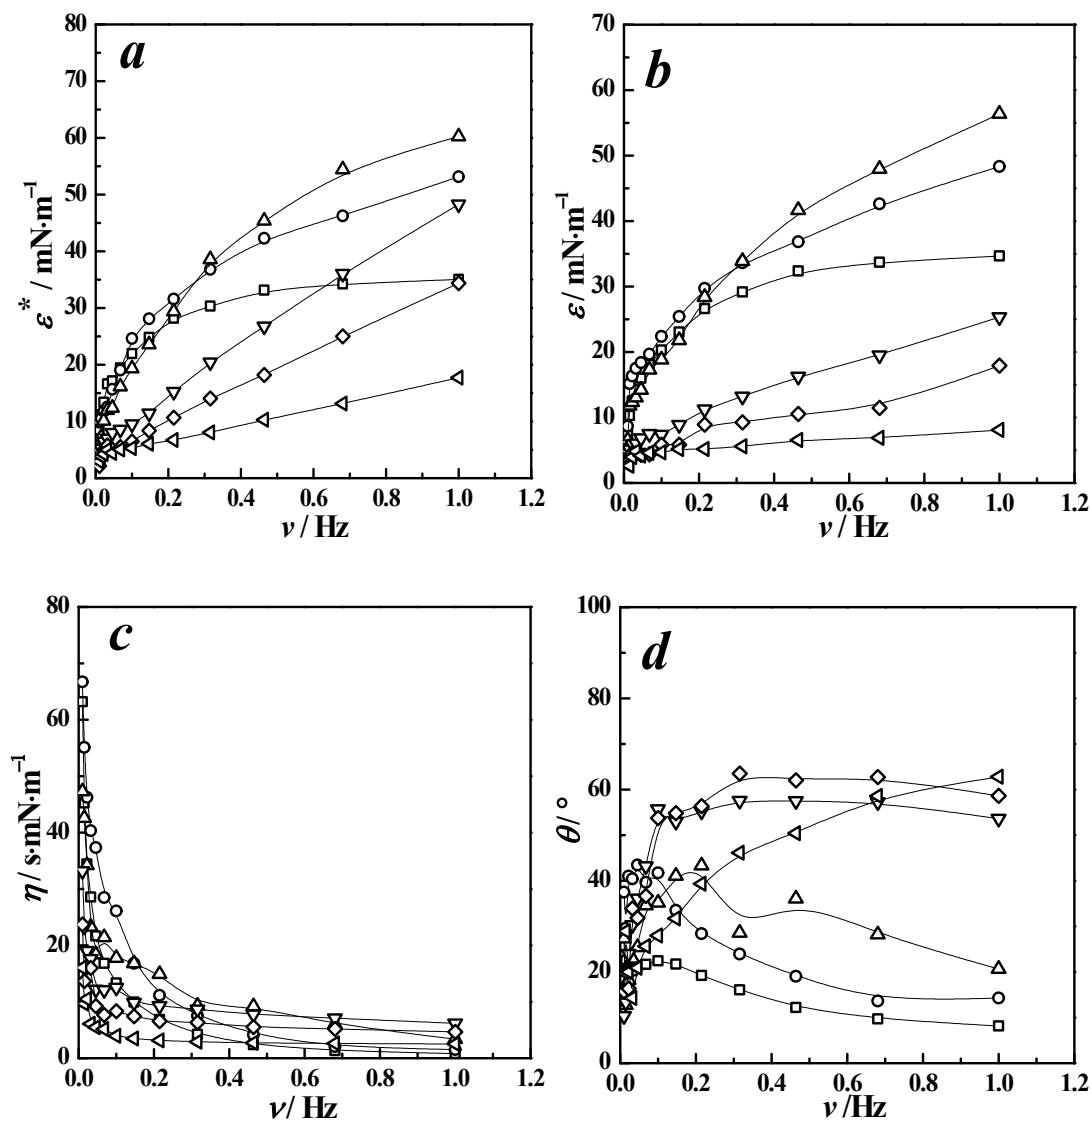

**Fig.S13** The experimental plots of complex modulus ( $\epsilon^*$ , *a*), interfacial elasticity ( $\epsilon$ , *b*), interfacial viscosity ( $\eta$ , *c*) and phase angle ( $\theta$ , *d*), as a function of frequency ( $\nu$ ), respectively, in 12-2-12/2mMC<sub>7</sub>OH aqueous solutions at 25°C. The symbols represent different surfactant concentrations:  $\log(C/\text{mmol}\cdot\text{L}^{-1}) = -1.38$  ( $\square$ ),  $-1.18$  ( $\circ$ ),  $-0.93$  ( $\triangle$ ),  $-0.63$  ( $\nabla$ ),  $-0.52$  ( $\diamond$ ),  $-0.30$  ( $\blacktriangleleft$ )

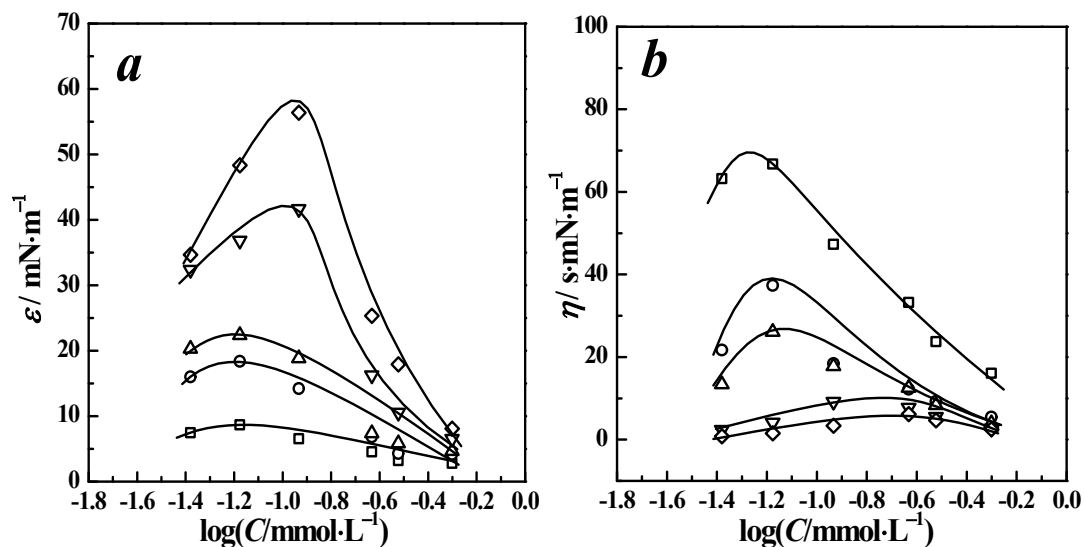

**Fig.S14** Semilogarithmic plots of dilational interfacial elasticity ( $\epsilon$ , *a*) and interfacial viscosity ( $\eta$ , *b*) of 12-2-12/2mMC<sub>7</sub>OH as a function of the surfactant concentration  $C$  for different frequencies. The symbols represent  $\nu/\text{Hz} = 0.01$  ( $\square$ ),  $0.046$  ( $\circ$ ),  $0.1$  ( $\triangle$ ),  $0.464$  ( $\nabla$ ) and  $1$  ( $\diamond$ )

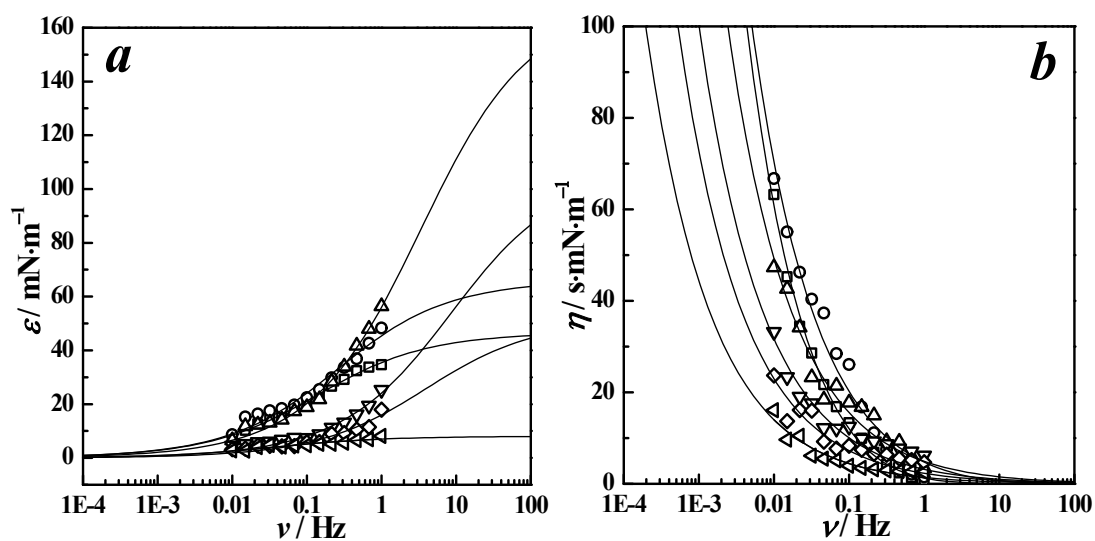

**Fig.S15** Fitting results of dilational interfacial elasticity ( $\epsilon$ , *a*) and interfacial viscosity ( $\eta$ , *b*) in terms of LVT model for 12-2-12/2mMC<sub>7</sub>OH aqueous solutions at 25°C. The symbols represent different surfactant concentrations:  $\log(C/\text{mmol}\cdot\text{L}^{-1}) = -1.38$  ( $\square$ ),  $-1.18$  ( $\circ$ ),  $-0.93$  ( $\triangle$ ),  $-0.63$  ( $\nabla$ ),  $-0.52$  ( $\diamond$ ),  $-0.30$  ( $\blacktriangleleft$ )

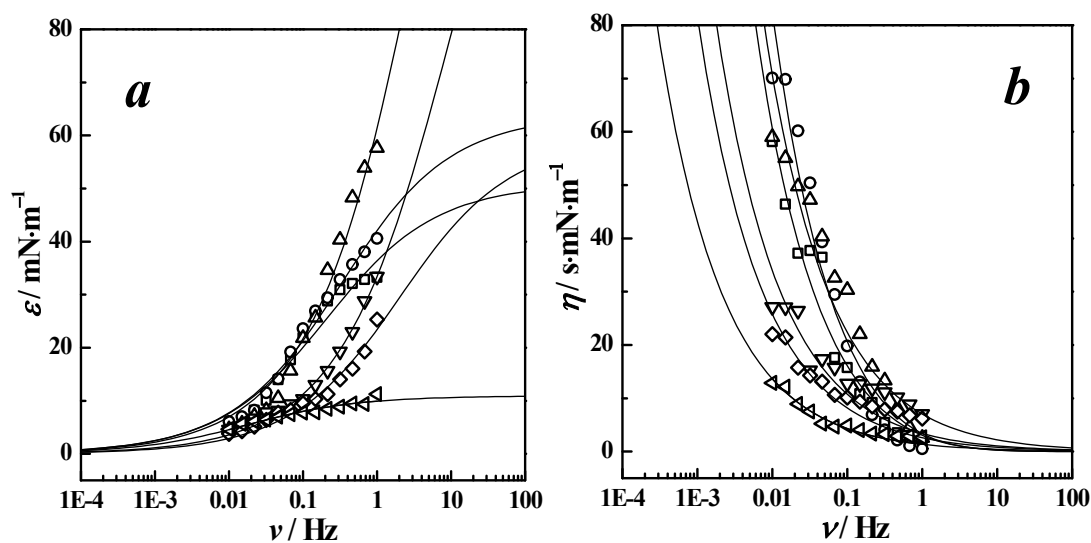

**Fig.S16** Fitting results of dilational interfacial elasticity ( $\varepsilon$ , **a**) and interfacial viscosity ( $\eta$ , **b**) in terms of LVT model for 12-2-12/0.7 mmol·L<sup>-1</sup>C<sub>7</sub>OH aqueous solutions. The symbols represent different surfactant concentrations:  $\log(C/\text{mmol}\cdot\text{L}^{-1}) = -1.38$  ( $\square$ ),  $-1.18$  ( $\circ$ ),  $-0.93$  ( $\triangle$ ),  $-0.63$ ( $\nabla$ ),  $-0.52$  ( $\diamond$ ),  $-0.30$  ( $\blacktriangleleft$ )

**Table S2** Foam decay time  $t_{1/2}^{\max}$  and limiting interfacial elasticity  $\varepsilon_{0,fit}$  of 12-2-12/0.3mMC<sub>7</sub>OH、12-2-12/0.7mMC<sub>7</sub>OH and 12-2-12/2mMC<sub>7</sub>OH mixed systems at the surface excess of 80%

| system                                               | 12-2-12/0.3mMC <sub>7</sub> OH | 12-2-12/0.7mMC <sub>7</sub> OH | 12-2-12/2mMC <sub>7</sub> OH |
|------------------------------------------------------|--------------------------------|--------------------------------|------------------------------|
| $10^{10}\Gamma_{\max}$ mol·cm <sup>-2</sup>          | 3.62                           | 3.92                           | 3.41                         |
| 80%* $10^{10}\Gamma_{\max}$<br>/mol·cm <sup>-2</sup> | 2.90                           | 3.14                           | 2.73                         |
| $C/\text{mmol}\cdot\text{L}^{-1}$                    | 0.045                          | 0.033                          | 0.026                        |
| $\varepsilon_{0,fit}/\text{mN}\cdot\text{m}^{-1}$    | 54.82                          | 81.92                          | 60.13                        |
| $t_{1/2}^{\max}$ /min                                | 846                            | 1497                           | 1102                         |

**Table S3** Fitting parameters  $\varepsilon_{0,\text{fit}}$  and  $\omega_{0,\text{fit}}$  of 12-2-12 and alcohol mixtures

| 12-2-12 + alcohol                          |                              |                         |                                            |                              |                         |                                            |                              |                         |
|--------------------------------------------|------------------------------|-------------------------|--------------------------------------------|------------------------------|-------------------------|--------------------------------------------|------------------------------|-------------------------|
| 4.0 mmol·L <sup>-1</sup> C <sub>6</sub> OH |                              |                         | 5.5 mmol·L <sup>-1</sup> C <sub>6</sub> OH |                              |                         | 8.0 mmol·L <sup>-1</sup> C <sub>6</sub> OH |                              |                         |
| <i>C</i>                                   | $\varepsilon_{0,\text{fit}}$ | $\omega_{0,\text{fit}}$ | <i>C</i>                                   | $\varepsilon_{0,\text{fit}}$ | $\omega_{0,\text{fit}}$ | <i>C</i>                                   | $\varepsilon_{0,\text{fit}}$ | $\omega_{0,\text{fit}}$ |
| 0.04                                       | 22                           | 0.16                    | 0.04                                       | 44                           | 1.82                    | 0.04                                       | 41                           | 2.02                    |
| 0.07                                       | 71                           | 1.54                    | 0.07                                       | 108                          | 6.97                    | 0.10                                       | 98                           | 0.63                    |
| 0.10                                       | 111                          | 5.20                    | 0.10                                       | 182                          | 7.21                    | 0.17                                       | 197                          | 11.15                   |
| 0.17                                       | 171                          | 9.00                    | 0.17                                       | 241                          | 9.69                    | 0.25                                       | 146                          | 8.19                    |
| 0.25                                       | 114                          | 4.21                    | 0.25                                       | 169                          | 2.31                    | 0.40                                       | 56                           | 3.59                    |
| 0.40                                       | 46                           | 1.36                    | 0.40                                       | 71                           | 1.21                    | 0.63                                       | 11                           | 0.11                    |
|                                            |                              |                         | 0.63                                       | 12                           | 0.55                    |                                            |                              |                         |
| 0.3 mmol·L <sup>-1</sup> C <sub>7</sub> OH |                              |                         | 0.7 mmol·L <sup>-1</sup> C <sub>7</sub> OH |                              |                         | 2.0 mmol·L <sup>-1</sup> C <sub>7</sub> OH |                              |                         |
| 0.05                                       | 58                           | 0.67                    | 0.04                                       | 51                           | 0.81                    | 0.04                                       | 47                           | 0.86                    |
| 0.07                                       | 72                           | 1.49                    | 0.07                                       | 64                           | 6.32                    | 0.07                                       | 66                           | 1.63                    |
| 0.12                                       | 117                          | 10.74                   | 0.12                                       | 206                          | 8.51                    | 0.12                                       | 170                          | 11.19                   |
| 0.18                                       | 143                          | 14.23                   | 0.23                                       | 155                          | 16.94                   | 0.23                                       | 107                          | 3.94                    |
| 0.30                                       | 45                           | 6.59                    | 0.30                                       | 80                           | 5.06                    | 0.3                                        | 52                           | 4.92                    |
| 0.50                                       | 10                           | 0.11                    | 0.50                                       | 11                           | 2.64                    | 0.5                                        | 8                            | 0.24                    |

Note: *C*,  $\varepsilon_{0,\text{fit}}$  and  $\omega_{0,\text{fit}}$  are in mmol·L<sup>-1</sup>, mN·m<sup>-1</sup> and s<sup>-1</sup>, respectively.
